# Supplementary material for: High-throughput large scale microfluidic assembly of iron oxide nanoflowers@PS-b-PAA polymeric micelles as multimodal nanoplatforms for photothermia and magnetic imaging
Source: Royal Society of Chemistry journal article supplement (doi:10.1039/d3na00700f), 2023-11-20
Supplement: d3na00700f1.pdf [file d3na00700f1.pdf]

## Electronic Supplementary Information

### High-throughput large-scale microfluidic assembly of iron oxide magnetite nanoflowers@PS-b-PAA polymeric micelles as multimodal nanoplatforms for photothermia and magnetic imaging

Emilia Benassai<sup>1</sup>, Ana C. Hortelao<sup>1</sup>, Elif Aygun<sup>2,3</sup>, Asli Alpman<sup>2,3</sup>, Claire Wilhelm<sup>4</sup>, Emine Ulku Saritas<sup>2,3</sup> and Ali Abou-Hassan<sup>1,5</sup>

<sup>1</sup> Sorbonne Université, UMR CNRS 8234, PHysico-chimie des Électrolytes et Nanosystèmes Interfaciaux (PHENIX), F-75005, Paris, France

<sup>2</sup> Department of Electrical and Electronics Engineering, Bilkent University, Ankara, Turkey, 06800

<sup>3</sup> National Magnetic Resonance Research Center (UMRAM), Bilkent University, Ankara, Turkey, 06800

<sup>4</sup> Laboratoire Physico Chimie Curie, PCC, CNRS UMR168, Institut Curie, Sorbonne University, PSL University, Paris, 75005 France

<sup>5</sup> Institut Universitaire de France (IUF), 75231 Cedex 05, Paris, France

**Corresponding author:** ali.abou\_hassan@sorbonne-universite.fr

**Table S1.** Sample names (capital letters) and respective variable and constant parameters for the continuous flow synthesis of IONF@PS-b-PAA magnetomicelles.

| Sample Names | H <sub>2</sub> O Flow (Q <sub>1</sub> , Q <sub>2</sub> ) | THF Flow             | Total Flow           | $\tau$ | $\alpha$ | [Fe] 1:5          | [PS-b-PAA] 4:5    |
|--------------|----------------------------------------------------------|----------------------|----------------------|--------|----------|-------------------|-------------------|
|              | mL·min <sup>-1</sup>                                     | mL·min <sup>-1</sup> | mL·min <sup>-1</sup> | s      |          | g·L <sup>-1</sup> | g·L <sup>-1</sup> |
| i            | 10.000                                                   | 2.857                | 22.857               | 1      | 7        | 0.2               | 1.2               |
| ii           | 7.000                                                    | 2.000                | 16.000               | 2      | 7        | 0.2               | 1.2               |
| iii          | 4.200                                                    | 1.200                | 9.600                | 3      | 7        | 0.2               | 1.2               |
| iv           | 2.800                                                    | 0.800                | 6.400                | 4      | 7        | 0.2               | 1.2               |
| v            | 1.400                                                    | 0.400                | 3.200                | 9      | 7        | 0.2               | 1.2               |
| vi           | 0.700                                                    | 0.200                | 1.600                | 18     | 7        | 0.2               | 1.2               |
| vii          | 0.175                                                    | 0.050                | 0.400                | 71     | 7        | 0.2               | 1.2               |

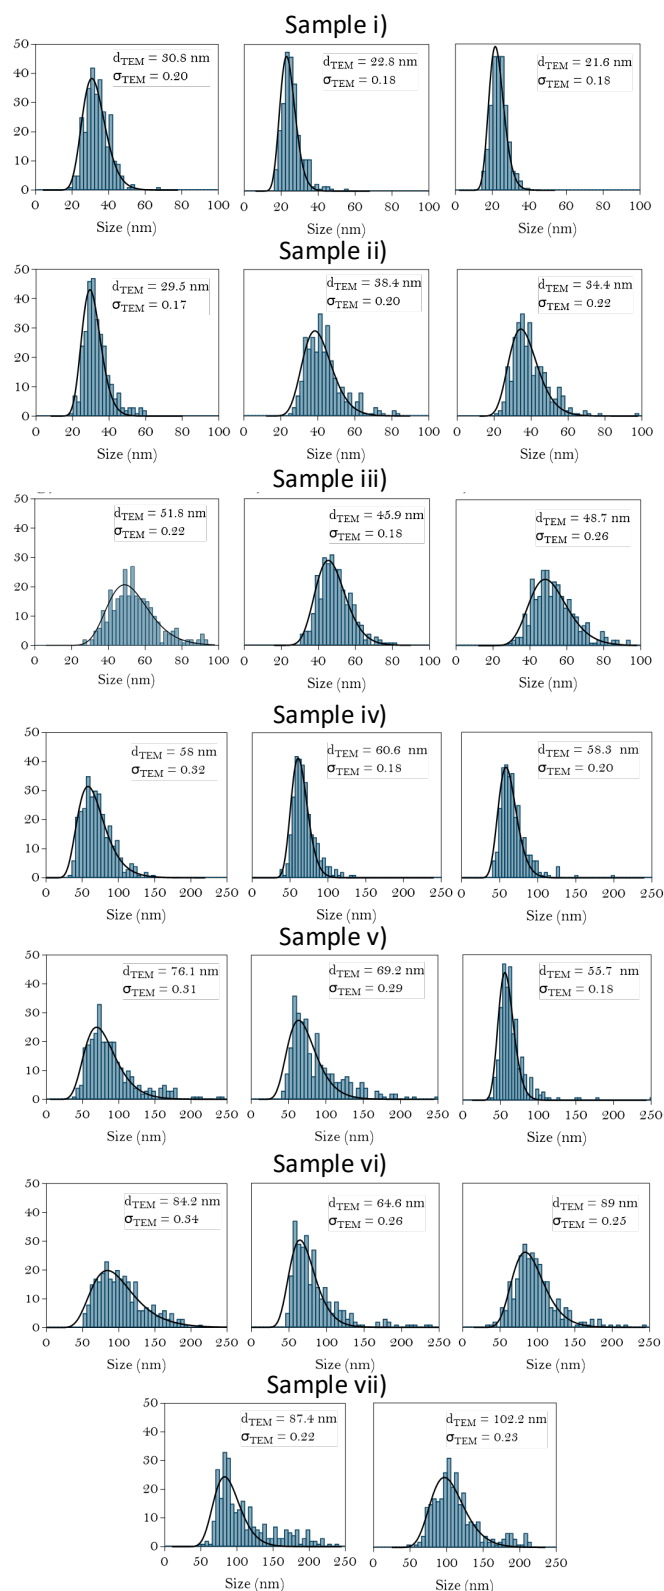

**Figure S1.** Size distribution histograms of IONF@PS-b-PAA magnetomicelles fitted by a log-normal law and synthesized in triplicate or duplicate of the different magnetomicelles synthesized by modulating the residence time in the microfluidic channel. Black line: log-normal model.

**Table S2.** Physical diameter ( $d_{\text{TEM}}$ ) and polydispersity ( $\sigma_{\text{TEM}}$ ) and their averaged values ( $\langle d_{\text{TEM}} \rangle$ ,  $\langle \sigma_{\text{TEM}} \rangle$ ) of triplicate sharing the same synthesis conditions (as described in Table 9). Hydrodynamic diameters ( $d_{\text{H}}$ ) and zeta potentials ( $\zeta$ ) obtained by DLS analysis are also reported, along with their averaged values ( $\langle d_{\text{H}} \rangle$ ,  $\langle \zeta \rangle$ ) and the parameter of aggregation  $\delta_{\text{agg}}$ .

| Sample Name | $d_{\text{TEM}}$ | $\langle d_{\text{TEM}} \rangle$ | $\sigma$ | $\langle \sigma \rangle$ | $d_{\text{H}}$ | $\langle d_{\text{H}} \rangle$ | $\zeta$ | $\langle \zeta \rangle$ | $\delta_{\text{agg}}$ |
|-------------|------------------|----------------------------------|----------|--------------------------|----------------|--------------------------------|---------|-------------------------|-----------------------|
|             | nm               | nm                               | nm       | nm                       | nm             | nm                             | mV      | mV                      | %                     |
| i           | 31               |                                  | 0.2      |                          | 20             |                                | -26     |                         |                       |
|             | 23               | 25 ( $\pm 5$ )                   | 0.18     | 0.187 ( $\pm 0.012$ )    | 27             | 26 ( $\pm 5$ )                 | -20     | -24 ( $\pm 4$ )         | 3                     |
|             | 22               |                                  | 0.18     |                          | 30             |                                | -27     |                         |                       |
| ii          | 30               |                                  | 0.17     |                          | 28             |                                | -28     |                         |                       |
|             | 38               | 34 ( $\pm 3$ )                   | 0.2      | 0.197 ( $\pm 0.025$ )    | 45             | 40 ( $\pm 11$ )                | -24     | -24 ( $\pm 4$ )         | 9                     |
|             | 34               |                                  | 0.22     |                          | 48             |                                | -20     |                         |                       |
| iii         | 52               |                                  | 0.22     |                          | 56             |                                | -30     |                         |                       |
|             | 46               | 49 ( $\pm 3$ )                   | 0.18     | 0.203 ( $\pm 0.021$ )    | 66             | 64 ( $\pm 8$ )                 | -35     | -32 ( $\pm 3$ )         | 24                    |
|             | 49               |                                  | 0.21     |                          | 70             |                                | -32     |                         |                       |
| iv          | 58               |                                  | 0.32     |                          | 69             |                                | -15     |                         |                       |
|             | 61               | 59 ( $\pm 1$ )                   | 0.18     | 0.233 ( $\pm 0.077$ )    | 67             | 70 ( $\pm 3$ )                 | -27     | -22 ( $\pm 6$ )         | 16                    |
|             | 58               |                                  | 0.2      |                          | 73             |                                | -24     |                         |                       |
| v           | 76               |                                  | 0.31     |                          | 61             |                                | -28     |                         |                       |
|             | 69               | 67 ( $\pm 11$ )                  | 0.3      | 0.267 ( $\pm 0.067$ )    | 257            | 133 ( $\pm 108$ )              | -19     | -23 ( $\pm 5$ )         | 50                    |
|             | 56               |                                  | 0.18     |                          | 82             |                                | -22     |                         |                       |
| vi          | 84               |                                  | 0.34     |                          | 215            |                                | -35     |                         |                       |
|             | 65               | 79 ( $\pm 13$ )                  | 0.26     | 0.283 ( $\pm 0.049$ )    | 171            | 158 ( $\pm 65$ )               | -38     | -39 ( $\pm 4$ )         | 50                    |
|             | 89               |                                  | 0.25     |                          | 87             |                                | -43     |                         |                       |
| vii         | 87               |                                  | 0.22     |                          | 280            |                                | -26     |                         |                       |
|             | 102              | 95 ( $\pm 11$ )                  | 0.23     | 0.225 ( $\pm 0.007$ )    | 112            | 228 ( $\pm 100$ )              | -32     | -29 ( $\pm 4$ )         | 58                    |
|             | -                |                                  | -        |                          | -              |                                | -       |                         |                       |

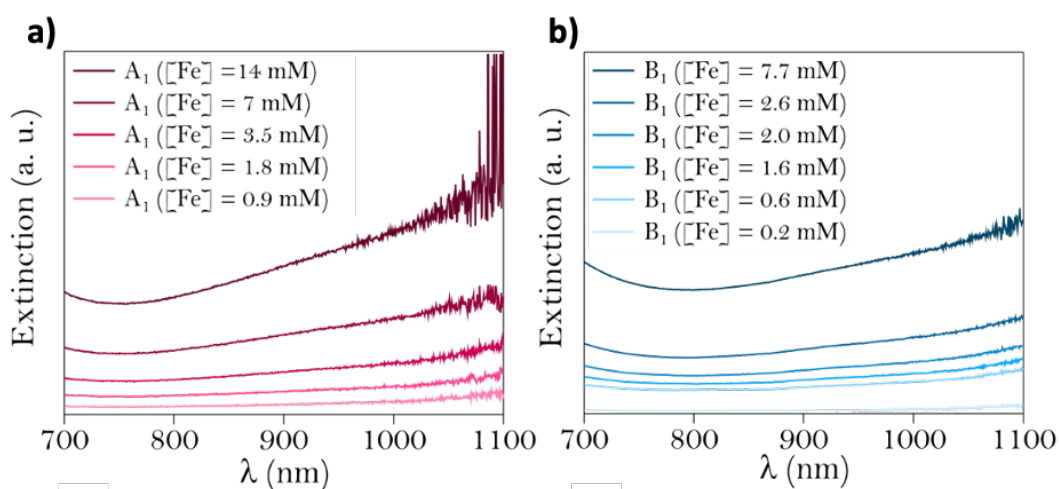

**Figure S2.** Experimental absorbance at 808 nm and 1064 nm and its dependence on total iron concentration for: a) IONFs (A1) and b) IONF@PS-b-PAA (B1) magnetic micelles

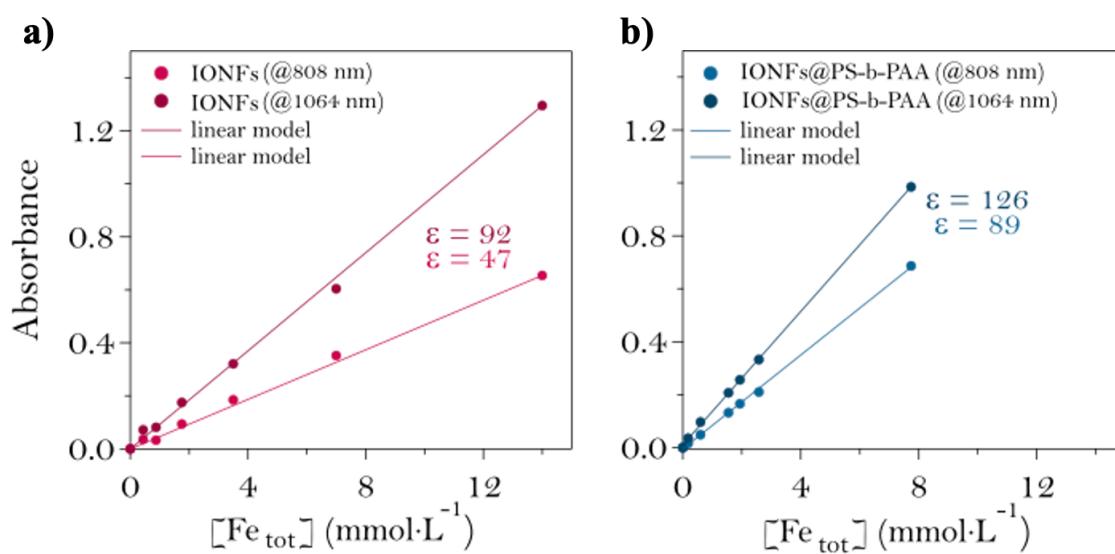

**Figure S3.** Characterization of the properties of the IONFs and IONFs@PS-b-PAA magnetic micelles. Beer-Lambert plot at two lasers wavelengths 808 nm and 1064 nm of a) IONFs and b) IONFs@PS-b-PAA.

**Table S3.** Real (n) and imaginary (k) parts of refractive index of Fe<sub>3</sub>O<sub>4</sub> for wavelengths ranging from 0.25 μm to 2 μm.

| n     | k     | λ    | n     | k     | λ    | n     | k     | λ    | n     | k     | λ    |
|-------|-------|------|-------|-------|------|-------|-------|------|-------|-------|------|
|       |       | μm   |       |       | μm   |       |       | μm   |       |       | μm   |
| 1.315 | 1.899 | 0.25 | 0.034 | 2.99  | 0.69 | 0.011 | 2.739 | 1.13 | 0.02  | 2.681 | 1.57 |
| 1.317 | 2.007 | 0.26 | 0.031 | 2.972 | 0.7  | 0.01  | 2.737 | 1.14 | 0.02  | 2.68  | 1.58 |
| 1.3   | 2.11  | 0.27 | 0.028 | 2.956 | 0.71 | 0.01  | 2.734 | 1.15 | 0.021 | 2.679 | 1.59 |
| 1.27  | 2.197 | 0.28 | 0.026 | 2.942 | 0.72 | 0.009 | 2.732 | 1.16 | 0.022 | 2.678 | 1.6  |
| 1.233 | 2.261 | 0.29 | 0.024 | 2.929 | 0.73 | 0.009 | 2.729 | 1.17 | 0.023 | 2.677 | 1.61 |
| 1.208 | 2.307 | 0.3  | 0.022 | 2.916 | 0.74 | 0.01  | 2.727 | 1.18 | 0.023 | 2.677 | 1.62 |
| 1.195 | 2.357 | 0.31 | 0.021 | 2.903 | 0.75 | 0.01  | 2.725 | 1.19 | 0.024 | 2.677 | 1.63 |
| 1.169 | 2.416 | 0.32 | 0.02  | 2.892 | 0.76 | 0.011 | 2.723 | 1.2  | 0.024 | 2.677 | 1.64 |
| 1.122 | 2.454 | 0.33 | 0.02  | 2.882 | 0.77 | 0.011 | 2.721 | 1.21 | 0.024 | 2.677 | 1.65 |
| 1.085 | 2.45  | 0.34 | 0.019 | 2.872 | 0.78 | 0.011 | 2.719 | 1.22 | 0.024 | 2.676 | 1.66 |
| 1.093 | 2.43  | 0.35 | 0.019 | 2.862 | 0.79 | 0.011 | 2.718 | 1.23 | 0.024 | 2.676 | 1.67 |
| 1.14  | 2.433 | 0.36 | 0.02  | 2.853 | 0.8  | 0.011 | 2.716 | 1.24 | 0.024 | 2.676 | 1.68 |
| 1.202 | 2.47  | 0.37 | 0.022 | 2.845 | 0.81 | 0.011 | 2.715 | 1.25 | 0.024 | 2.675 | 1.69 |
| 1.258 | 2.545 | 0.38 | 0.024 | 2.838 | 0.82 | 0.011 | 2.714 | 1.26 | 0.024 | 2.674 | 1.7  |
| 1.291 | 2.645 | 0.39 | 0.025 | 2.833 | 0.83 | 0.01  | 2.712 | 1.27 | 0.024 | 2.674 | 1.71 |
| 1.294 | 2.756 | 0.4  | 0.026 | 2.828 | 0.84 | 0.01  | 2.709 | 1.28 | 0.025 | 2.673 | 1.72 |
| 1.271 | 2.863 | 0.41 | 0.027 | 2.824 | 0.85 | 0.011 | 2.708 | 1.29 | 0.025 | 2.673 | 1.73 |
| 1.231 | 2.962 | 0.42 | 0.027 | 2.82  | 0.86 | 0.012 | 2.706 | 1.3  | 0.025 | 2.673 | 1.74 |
| 1.173 | 3.052 | 0.43 | 0.026 | 2.816 | 0.87 | 0.013 | 2.705 | 1.31 | 0.025 | 2.672 | 1.75 |
| 1.101 | 3.126 | 0.44 | 0.026 | 2.813 | 0.88 | 0.013 | 2.704 | 1.32 | 0.025 | 2.672 | 1.76 |
| 1.02  | 3.181 | 0.45 | 0.026 | 2.809 | 0.89 | 0.013 | 2.703 | 1.33 | 0.026 | 2.671 | 1.77 |
| 0.943 | 3.217 | 0.46 | 0.024 | 2.805 | 0.9  | 0.013 | 2.702 | 1.34 | 0.026 | 2.672 | 1.78 |
| 0.874 | 3.242 | 0.47 | 0.024 | 2.801 | 0.91 | 0.013 | 2.7   | 1.35 | 0.025 | 2.671 | 1.79 |
| 0.809 | 3.264 | 0.48 | 0.023 | 2.798 | 0.92 | 0.013 | 2.699 | 1.36 | 0.024 | 2.67  | 1.8  |
| 0.741 | 3.28  | 0.49 | 0.023 | 2.794 | 0.93 | 0.013 | 2.697 | 1.37 | 0.025 | 2.669 | 1.81 |
| 0.675 | 3.282 | 0.5  | 0.023 | 2.791 | 0.94 | 0.014 | 2.696 | 1.38 | 0.025 | 2.668 | 1.82 |
| 0.622 | 3.272 | 0.51 | 0.022 | 2.789 | 0.95 | 0.015 | 2.695 | 1.39 | 0.026 | 2.667 | 1.83 |
| 0.587 | 3.262 | 0.52 | 0.021 | 2.787 | 0.96 | 0.015 | 2.693 | 1.4  | 0.026 | 2.666 | 1.84 |
| 0.564 | 3.266 | 0.53 | 0.02  | 2.784 | 0.97 | 0.016 | 2.693 | 1.41 | 0.027 | 2.665 | 1.85 |
| 0.538 | 3.286 | 0.54 | 0.018 | 2.781 | 0.98 | 0.017 | 2.692 | 1.42 | 0.029 | 2.664 | 1.86 |
| 0.498 | 3.318 | 0.55 | 0.017 | 2.778 | 0.99 | 0.017 | 2.692 | 1.43 | 0.031 | 2.664 | 1.87 |
| 0.437 | 3.348 | 0.56 | 0.015 | 2.775 | 1.00 | 0.017 | 2.691 | 1.44 | 0.032 | 2.665 | 1.88 |
| 0.357 | 3.361 | 0.57 | 0.015 | 2.771 | 1.01 | 0.017 | 2.69  | 1.45 | 0.032 | 2.666 | 1.89 |
| 0.274 | 3.348 | 0.58 | 0.014 | 2.768 | 1.02 | 0.017 | 2.689 | 1.46 | 0.032 | 2.667 | 1.9  |
| 0.202 | 3.312 | 0.59 | 0.013 | 2.765 | 1.03 | 0.017 | 2.687 | 1.47 | 0.032 | 2.667 | 1.91 |
| 0.149 | 3.265 | 0.6  | 0.012 | 2.762 | 1.04 | 0.018 | 2.686 | 1.48 | 0.032 | 2.667 | 1.92 |
| 0.114 | 3.218 | 0.61 | 0.011 | 2.759 | 1.05 | 0.018 | 2.686 | 1.49 | 0.032 | 2.667 | 1.93 |
| 0.089 | 3.175 | 0.62 | 0.011 | 2.755 | 1.06 | 0.019 | 2.685 | 1.5  | 0.032 | 2.667 | 1.94 |
| 0.073 | 3.135 | 0.63 | 0.011 | 2.753 | 1.07 | 0.019 | 2.684 | 1.51 | 0.031 | 2.667 | 1.95 |
| 0.065 | 3.102 | 0.64 | 0.011 | 2.75  | 1.08 | 0.019 | 2.683 | 1.52 | 0.031 | 2.667 | 1.96 |
| 0.057 | 3.074 | 0.65 | 0.011 | 2.747 | 1.09 | 0.02  | 2.683 | 1.53 | 0.031 | 2.666 | 1.97 |
| 0.051 | 3.051 | 0.66 | 0.011 | 2.745 | 1.1  | 0.021 | 2.682 | 1.54 | 0.031 | 2.666 | 1.98 |
| 0.043 | 3.029 | 0.67 | 0.011 | 2.742 | 1.11 | 0.021 | 2.682 | 1.55 | 0.031 | 2.665 | 1.99 |

**Table S4.** Real (n) and imaginary (k) parts of refractive index of polystyrene for wavelengths ranging from 0.25  $\mu\text{m}$  to 2  $\mu\text{m}$ .

| n       | k                   | $\lambda$     |
|---------|---------------------|---------------|---------|---------------------|---------------|---------|---------------------|---------------|---------|---------------------|---------------|
|         | ( $\cdot 10^{-7}$ ) | $\mu\text{m}$ |
| 1,62552 | 8,13                | 0,4           | 1,57637 | 5,55                | 0,81          | 1,56707 | 40,3                | 1,22          | 1,56402 | 192                 | 1,63          |
| 1,62163 | 7,28                | 0,41          | 1,57618 | 4,48                | 0,82          | 1,56707 | 27,9                | 1,23          | 1,56432 | 268                 | 1,64          |
| 1,61834 | 6,82                | 0,42          | 1,5758  | 4,21                | 0,83          | 1,56665 | 20,6                | 1,24          | 1,56402 | 242                 | 1,65          |
| 1,61546 | 6,7                 | 0,43          | 1,57563 | 5,34                | 0,84          | 1,56688 | 16,8                | 1,25          | 1,56391 | 387                 | 1,66          |
| 1,61279 | 6,5                 | 0,44          | 1,57539 | 5,11                | 0,85          | 1,56667 | 16,6                | 1,26          | 1,56342 | 1050                | 1,67          |
| 1,61037 | 6,33                | 0,45          | 1,57513 | 5,29                | 0,86          | 1,56692 | 18,8                | 1,27          | 1,56376 | 1600                | 1,68          |
| 1,60797 | 6,12                | 0,46          | 1,57489 | 12,2                | 0,87          | 1,56712 | 12,7                | 1,28          | 1,5636  | 1370                | 1,69          |
| 1,60594 | 6,02                | 0,47          | 1,57451 | 9,11                | 0,88          | 1,56643 | 12,7                | 1,29          | 1,56341 | 846                 | 1,7           |
| 1,60372 | 6,09                | 0,48          | 1,57437 | 8,2                 | 0,89          | 1,56571 | 15,1                | 1,3           | 1,56341 | 542                 | 1,71          |
| 1,60201 | 6,25                | 0,49          | 1,57409 | 5,35                | 0,9           | 1,56643 | 14,3                | 1,31          | 1,56363 | 480                 | 1,72          |
| 1,60021 | 6,11                | 0,5           | 1,57387 | 4,93                | 0,91          | 1,566   | 15,7                | 1,32          | 1,5639  | 440                 | 1,73          |
| 1,59862 | 6,12                | 0,51          | 1,57362 | 3,93                | 0,92          | 1,56583 | 17,4                | 1,33          | 1,56383 | 273                 | 1,74          |
| 1,59721 | 5,72                | 0,52          | 1,57343 | 2,85                | 0,93          | 1,56593 | 20,3                | 1,34          | 1,56336 | 334                 | 1,75          |
| 1,59587 | 5,62                | 0,53          | 1,57315 | 8,16                | 0,94          | 1,56618 | 22,8                | 1,35          | 1,56349 | 417                 | 1,76          |
| 1,59443 | 5,7                 | 0,54          | 1,57292 | 4                   | 0,95          | 1,56572 | 20,5                | 1,36          | 1,56337 | 362                 | 1,77          |
| 1,59338 | 5,78                | 0,55          | 1,57285 | 4,71                | 0,96          | 1,56639 | 35,5                | 1,37          | 1,56328 | 272                 | 1,78          |
| 1,59217 | 6,07                | 0,56          | 1,57256 | 2,04                | 0,97          | 1,56551 | 40                  | 1,38          | 1,56336 | 306                 | 1,79          |
| 1,59084 | 5,86                | 0,57          | 1,57231 | 2,34                | 0,98          | 1,56555 | 47,8                | 1,39          | 1,56314 | 291                 | 1,8           |
| 1,58996 | 5,95                | 0,58          | 1,57216 | 4,34                | 0,99          | 1,56579 | 50,5                | 1,4           | 1,56316 | 297                 | 1,81          |
| 1,58898 | 5,83                | 0,59          | 1,57211 | 3,49                | 1             | 1,56531 | 57,6                | 1,41          | 1,56293 | 272                 | 1,82          |
| 1,5882  | 6,36                | 0,6           | 1,57197 | 7,34                | 1,01          | 1,56534 | 61,2                | 1,42          | 1,56309 | 244                 | 1,83          |
| 1,58734 | 6,31                | 0,61          | 1,57197 | 7,39                | 1,02          | 1,56508 | 52,4                | 1,43          | 1,56296 | 248                 | 1,84          |
| 1,58653 | 5,93                | 0,62          | 1,56996 | 10,1                | 1,03          | 1,5651  | 50,8                | 1,44          | 1,56285 | 256                 | 1,85          |
| 1,58554 | 6,14                | 0,63          | 1,57013 | 9,61                | 1,04          | 1,56522 | 44,9                | 1,45          | 1,56279 | 268                 | 1,86          |
| 1,58493 | 6,27                | 0,64          | 1,5699  | 9,82                | 1,05          | 1,56532 | 40,1                | 1,46          | 1,5632  | 246                 | 1,87          |
| 1,58426 | 5,83                | 0,65          | 1,56958 | 9,36                | 1,06          | 1,56522 | 40                  | 1,47          | 1,56337 | 218                 | 1,88          |
| 1,58359 | 5,86                | 0,66          | 1,56904 | 9,04                | 1,07          | 1,5651  | 46,5                | 1,48          | 1,56296 | 214                 | 1,89          |
| 1,583   | 5,73                | 0,67          | 1,56938 | 8,95                | 1,08          | 1,56533 | 32,3                | 1,49          | 1,56302 | 211                 | 1,9           |
| 1,58237 | 5,64                | 0,68          | 1,56916 | 12,5                | 1,09          | 1,56463 | 30,6                | 1,5           | 1,5631  | 214                 | 1,91          |
| 1,5818  | 5,82                | 0,69          | 1,56904 | 11                  | 1,1           | 1,56471 | 28,2                | 1,51          | 1,5627  | 197                 | 1,92          |
| 1,58128 | 5,64                | 0,7           | 1,56911 | 13,5                | 1,11          | 1,56419 | 26,4                | 1,52          | 1,56293 | 189                 | 1,93          |
| 1,58061 | 6,02                | 0,71          | 1,56854 | 18,8                | 1,12          | 1,56448 | 24,5                | 1,53          | 1,56262 | 185                 | 1,94          |
| 1,58022 | 5,55                | 0,72          | 1,5687  | 41,2                | 1,13          | 1,56478 | 22,5                | 1,54          | 1,56275 | 192                 | 1,95          |
| 1,57972 | 5,76                | 0,73          | 1,56779 | 113                 | 1,14          | 1,56484 | 18,9                | 1,55          | 1,56273 | 184                 | 1,96          |
| 1,57926 | 5,67                | 0,74          | 1,56805 | 114                 | 1,15          | 1,56451 | 19,6                | 1,56          | 1,56303 | 179                 | 1,97          |
| 1,57889 | 5,51                | 0,75          | 1,56801 | 45,2                | 1,16          | 1,56462 | 21,3                | 1,57          | 1,56332 | 179                 | 1,98          |
| 1,57821 | 5,98                | 0,76          | 1,56851 | 29,6                | 1,17          | 1,56449 | 24,1                | 1,58          | 1,56277 | 175                 | 1,99          |
| 1,5777  | 6,08                | 0,77          | 1,56822 | 24,5                | 1,18          | 1,56403 | 28,4                | 1,59          | 1,56256 | 176                 | 2             |
| 1,57746 | 5,46                | 0,78          | 1,56803 | 34,4                | 1,19          | 1,56384 | 33,2                | 1,6           |         |                     |               |
| 1,57703 | 5,45                | 0,79          | 1,56767 | 46                  | 1,2           | 1,56384 | 44,6                | 1,61          |         |                     |               |
| 1,57674 | 5,54                | 0,8           | 1,56757 | 52,4                | 1,21          | 1,56447 | 81,1                | 1,62          |         |                     |               |

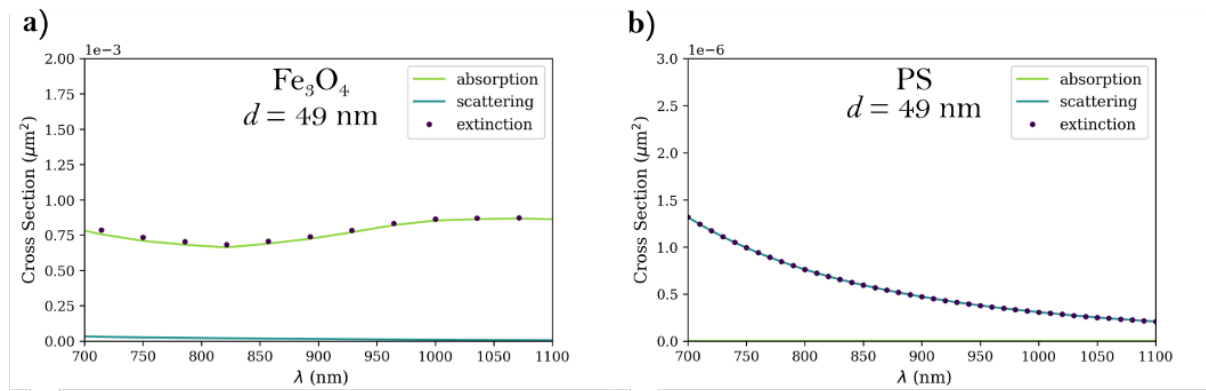

**Figure S4.** Simulated cross sections as a function of wavelength for a) IONFs and b) PS NPs with a  $d_{\text{TEM}} = 49$  nm. Green line: absorption contribution; light blue line: scattering con

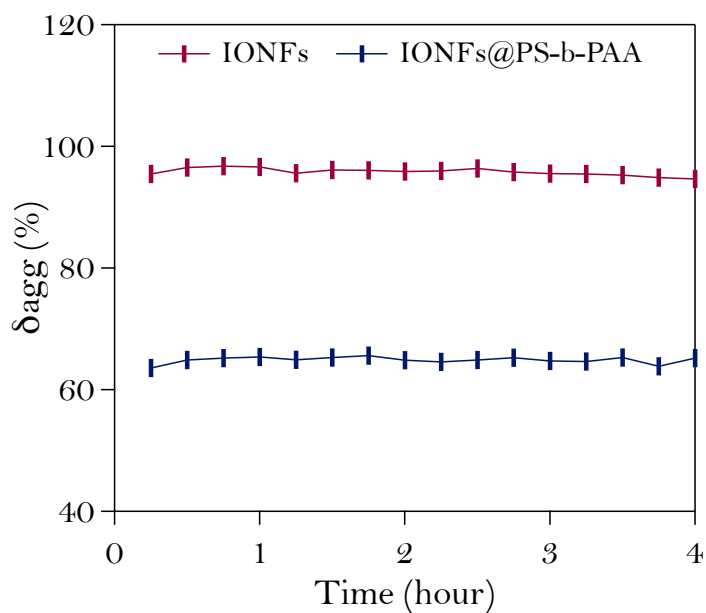

**Figure S5.** Percentage of aggregation reported as a function of incubation time (at 37°C in complete DMEM) for IONFs at 0.05 mM and IONFs@PS-b-PAA at 0.5 mM
